# Supplementary material
Source: Springer Nature journal article supplement (https://www.springermedizin.de/resource/supplementary/12985_2013_2159_MOESM1_ESM.pdf/9606190)
Supplement: MOESM1 [file 9606190]

VIRUS PARTICLE

LIQUID MEDIUM ON CELL EXTERIOR

LIGAND

FREE/ENGAGED RECEPTOR

LIPID MEMBRANE

SIGNALING

CLATHRIN

DYNAMIN

FORCES OF MOTION

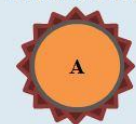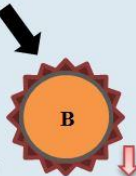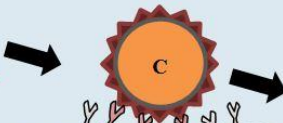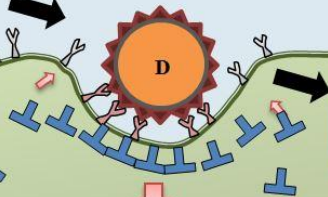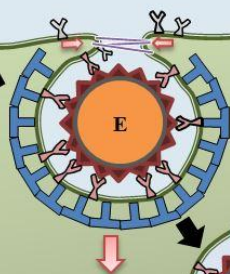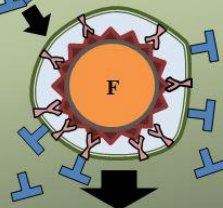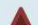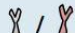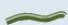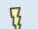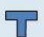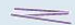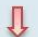

CELL
